# Supplementary material for: The Development of CDC25A-Derived Phosphoseryl Peptides That Bind 14-3-3ε with High Affinities
Source: MDPI journal article supplement (doi:10.3390/ijms25094918), 2024-04-30
Supplement: s1 [file s1]

# Supporting Information

## **The Development of CDC25A-Derived Phosphoseryl Peptides That Bind 14-3-3 $\epsilon$ With High Affinities.**

Seraphine Kamayirese, Sibaprasad Maity<sup>†</sup> Laura A. Hansen and Sándor Lovas\*

Department of Biomedical Sciences, Creighton University, Omaha, Nebraska 68178, United  
States

<sup>†</sup>Current address: Process Development, Corden Pharma, Boulder, Colorado 80301, United  
States

|                       |                                                                                                                             |
|-----------------------|-----------------------------------------------------------------------------------------------------------------------------|
| Corresponding author: | Sándor Lovas                                                                                                                |
| Address:              | Department of Biomedical Sciences<br>Criss II, Room 313<br>Creighton University<br>2500 California Plaza<br>Omaha, NE 68178 |
| Phone:                | 402-280-5753                                                                                                                |
| Fax:                  | 402-280-2690                                                                                                                |
| E-mail:               | <a href="mailto:slovas@creighton.edu">slovas@creighton.edu</a>                                                              |

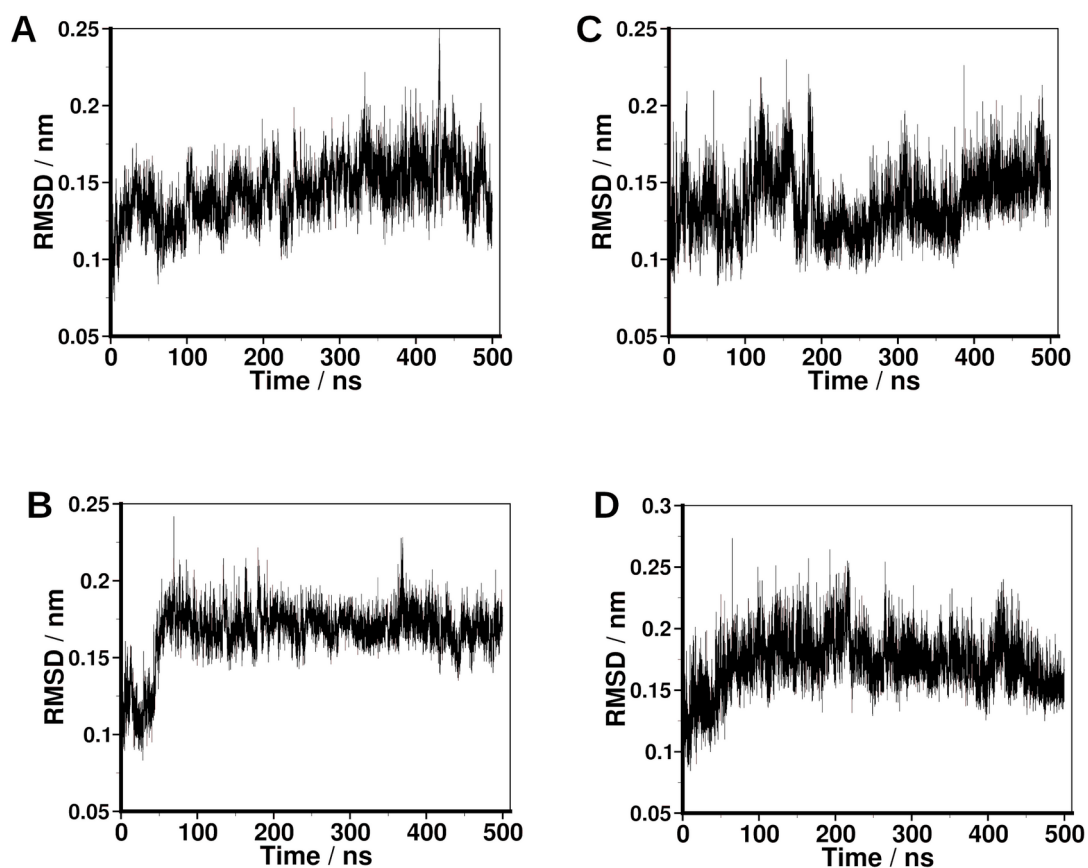

**Figure S1.** Molecular dynamics simulations of 14-3-3 $\epsilon$  in complex with pS analogs of various lengths. Root mean square deviation of system of 14-3-3 $\epsilon$  with (A) pS(173-185), (B) pS(173-184), (C) pS(173-183), (D) pS(174-183)

[Phe<sup>176</sup>]pS(174-182) system

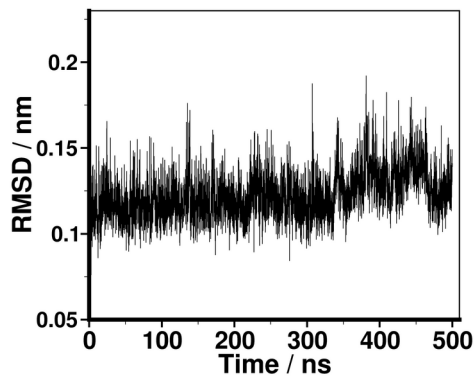

[Phe<sup>176</sup>]pS(174-182) chain A

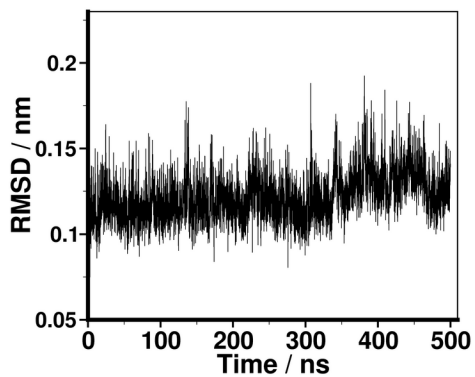

[Phe<sup>176</sup>]pS(174-182) chain B

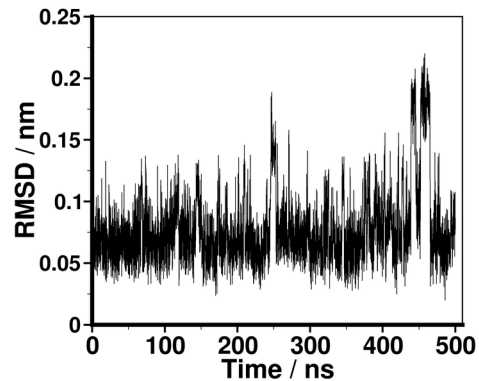

[Tyr<sup>176</sup>]pS(174-182) system

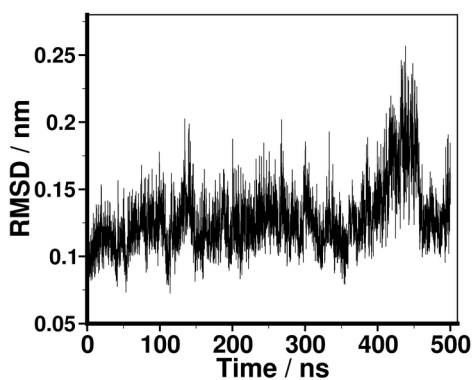

[Tyr<sup>176</sup>]pS(174-182) chain A

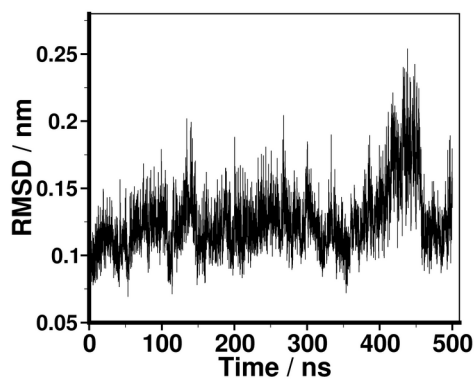

[Tyr<sup>176</sup>]pS(174-182) chain B

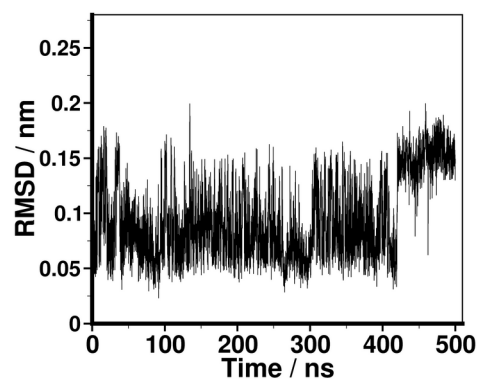

[Lys<sup>177</sup>]pS(174-182) system

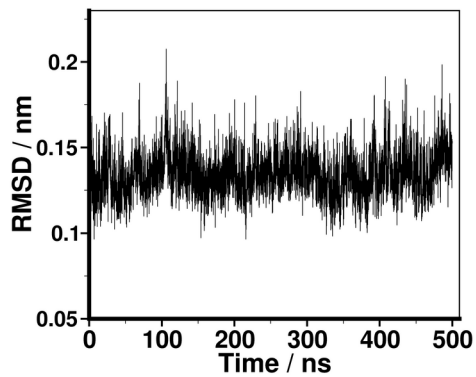

[Lys<sup>177</sup>]pS(174-182) chain A

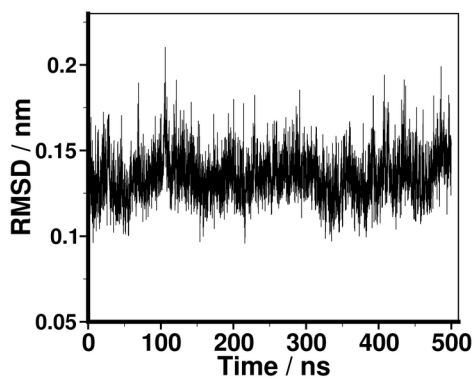

[Lys<sup>177</sup>]pS(174-182) chain B

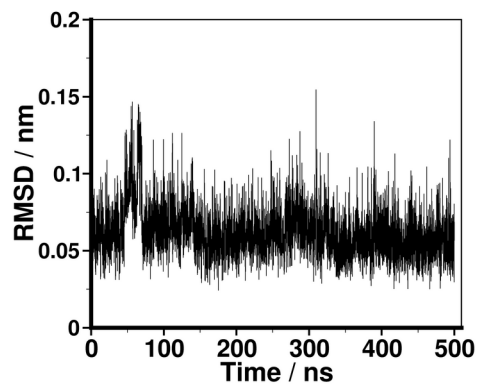

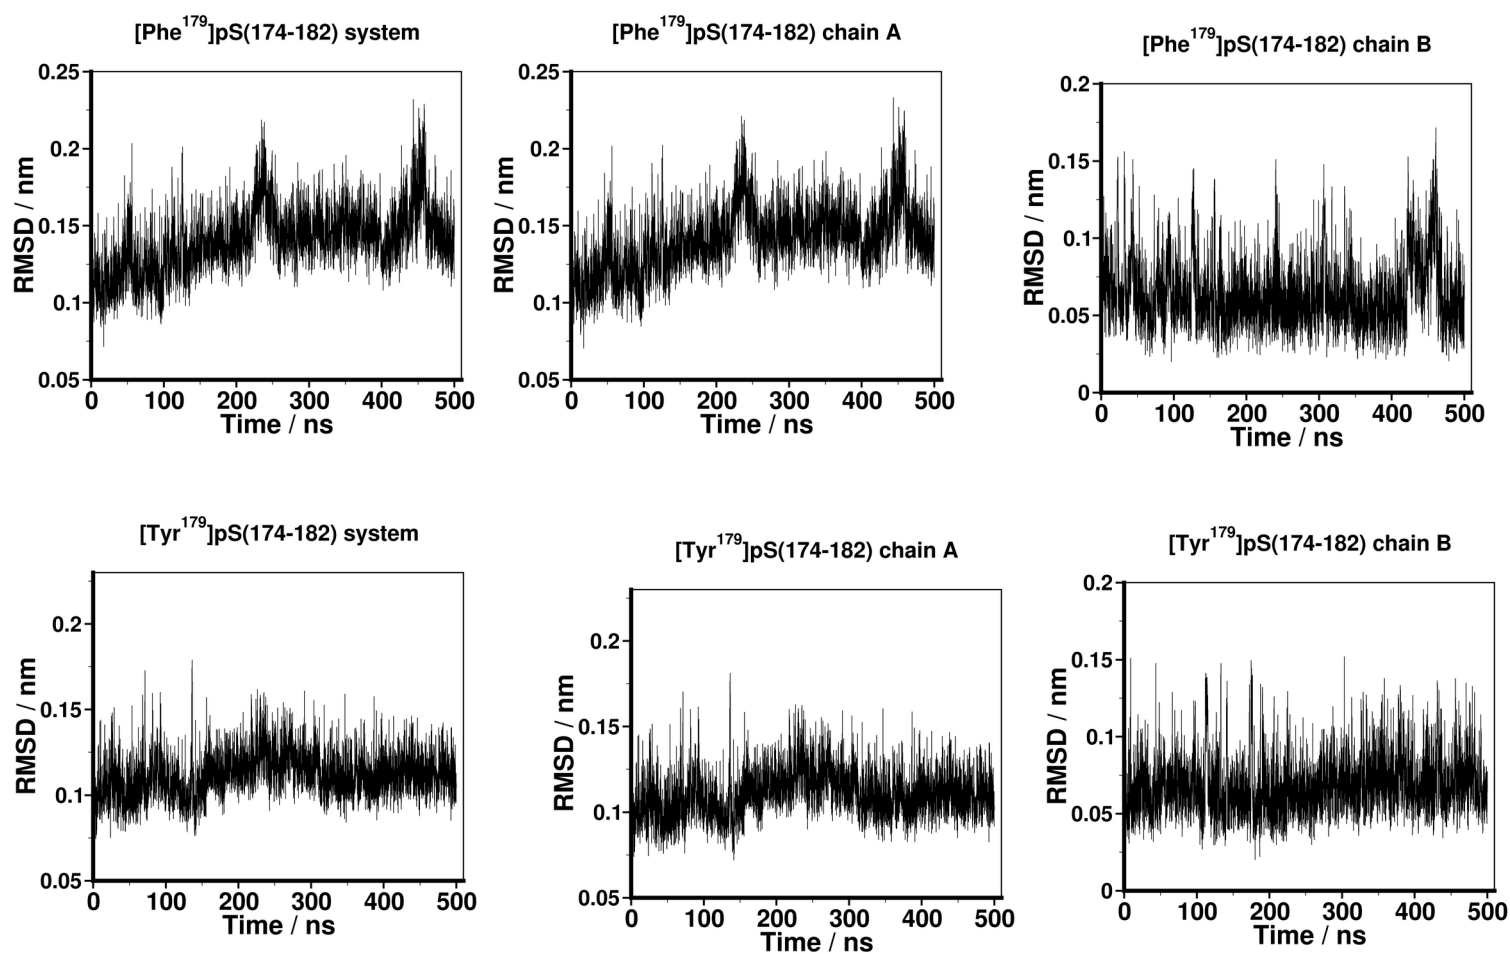

**Figure S2.** Molecular dynamics simulations of 14-3-3 $\epsilon$  in complex with the 9 amino acid residue peptide analogs. System (14-3-3 $\epsilon$ -peptide complex), chain A (14-3-3 $\epsilon$ ), chain B (peptide)

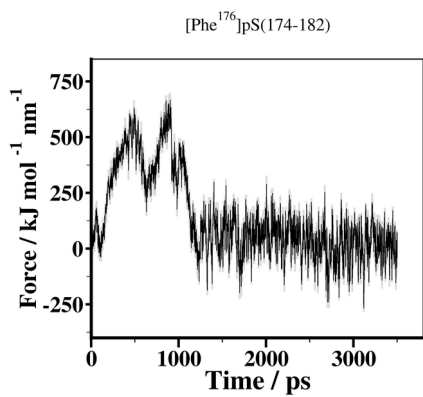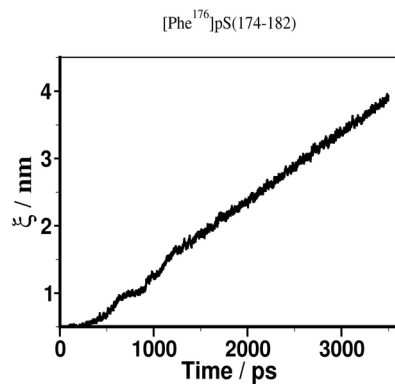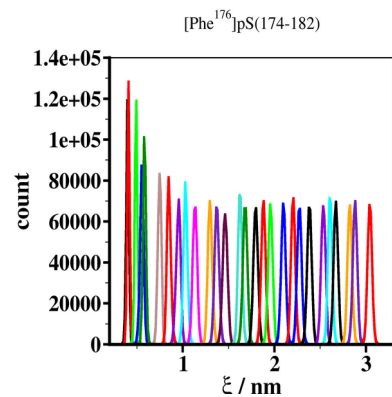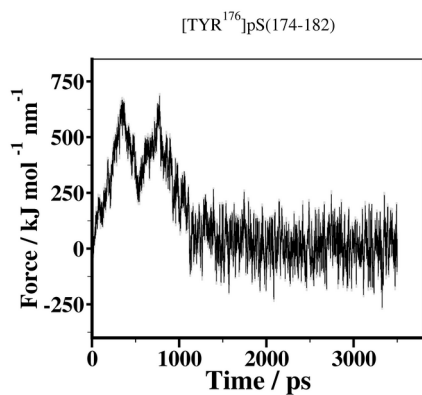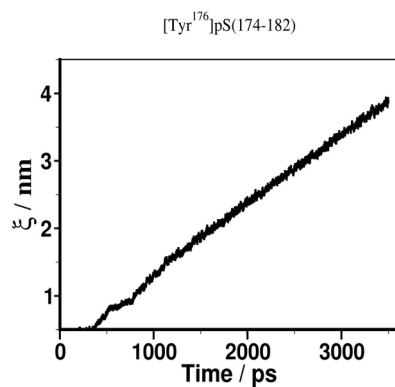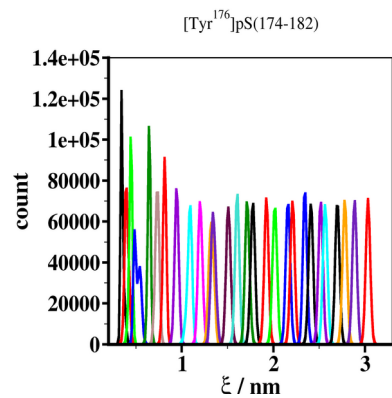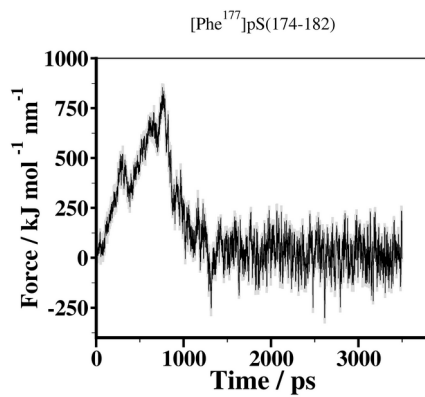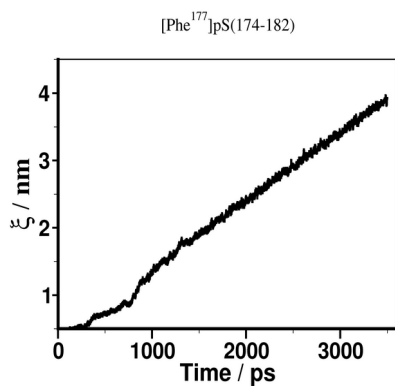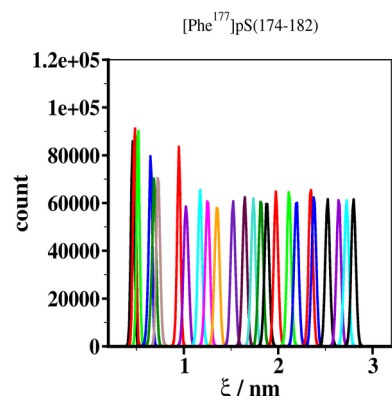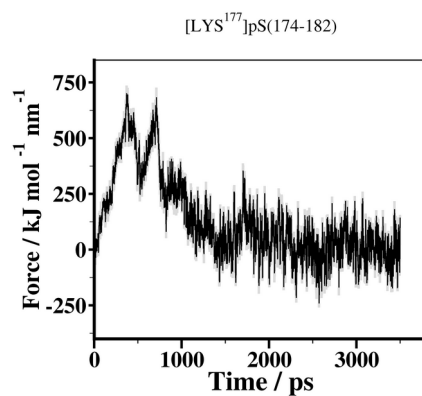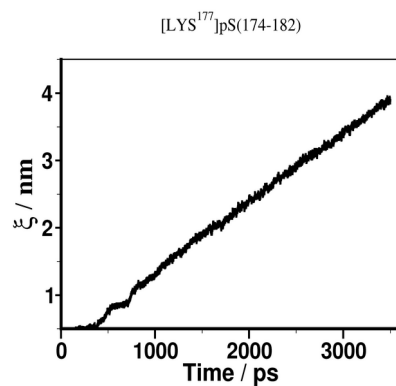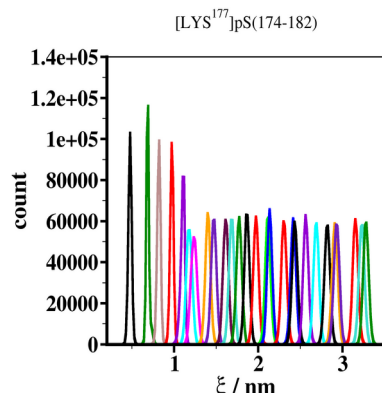

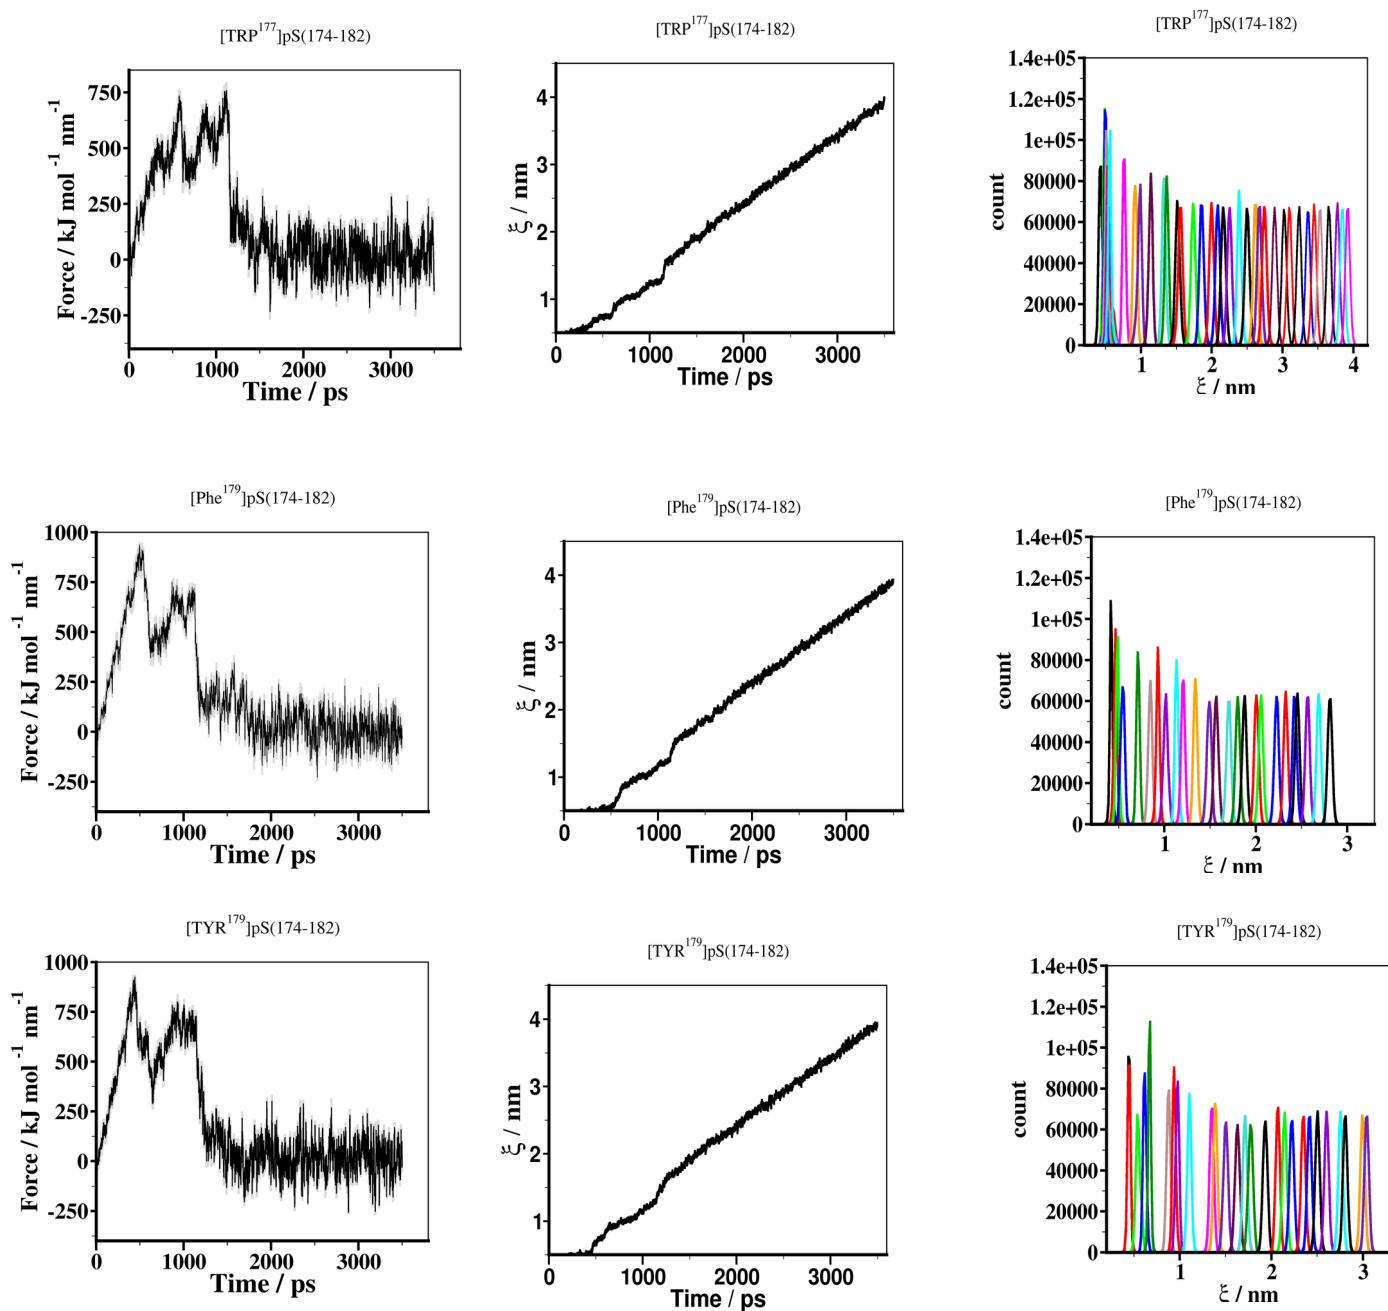

**Figure S3.** Steered MD simulation of 14-3-3ε – peptide complexes. External force applied to pull the peptide away from the protein during the simulation (left panels). Distance between COM of protein and COM of peptide during the simulation (middle panels). Umbrella sampling histograms of configurations from a 30 ns simulation (right panels)

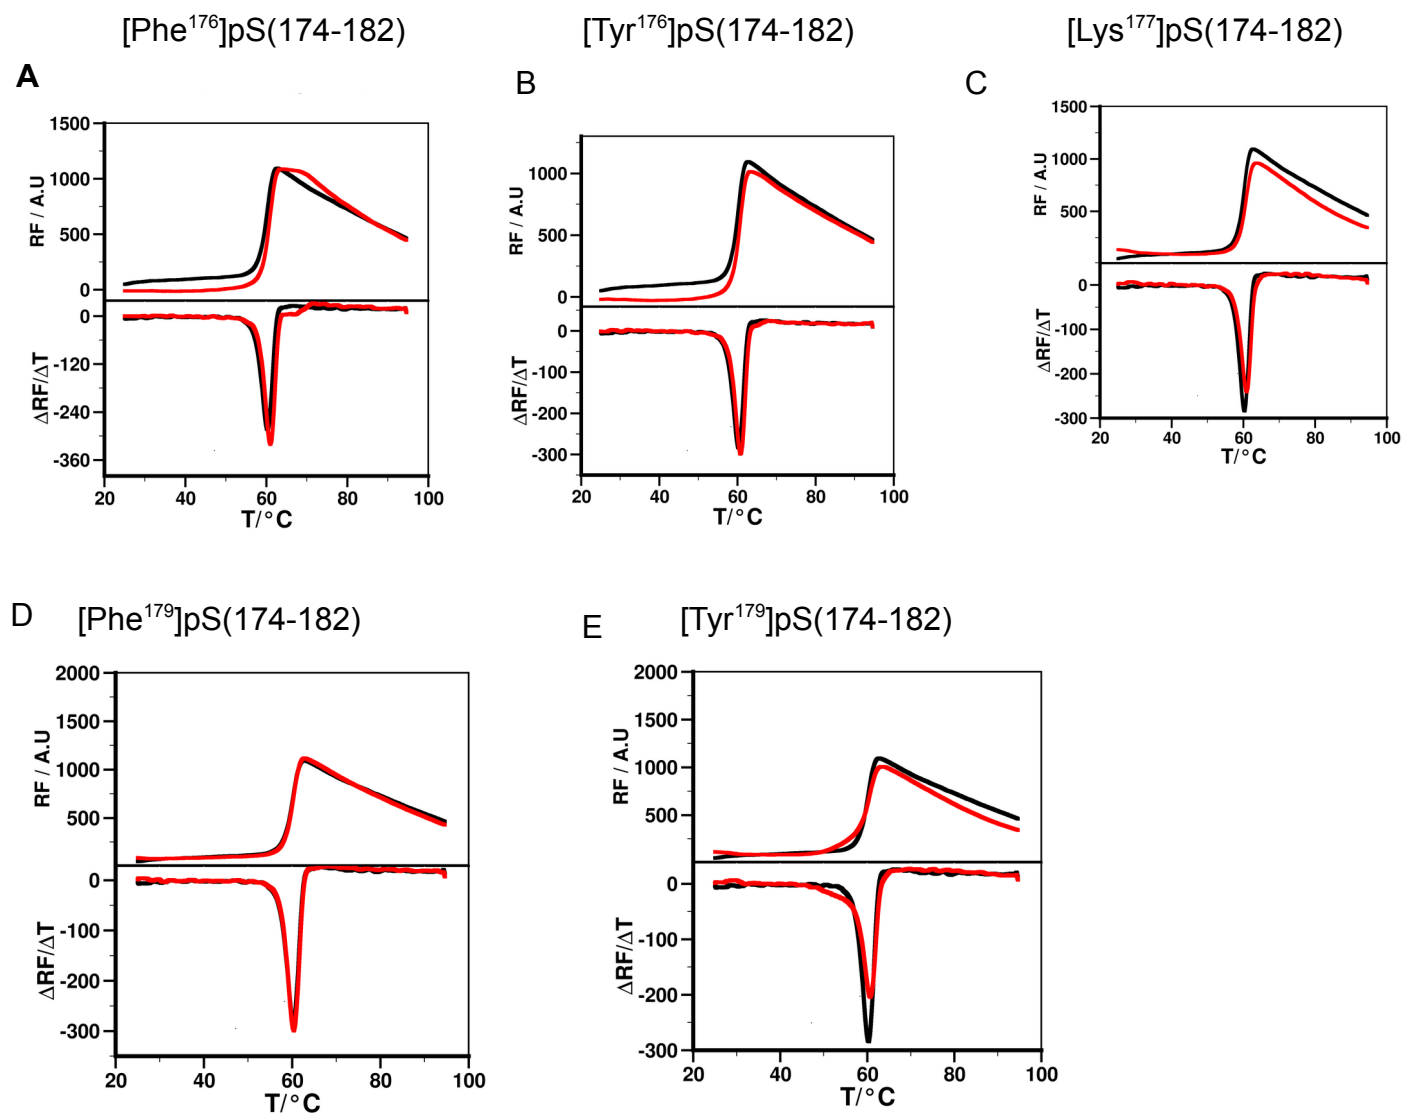

**Figure S4.** Thermal denaturation of 14-3-3ε studied using differential scanning fluorimetry. Melting curve of 14-3-3ε alone (black), and 14-3-3 in presence of a peptide (red), and their respective first derivative curve. (A) [Tyr<sup>176</sup>] pS(174-182), (B) [Tyr<sup>176</sup>] pS(174-182), (C) [Lys<sup>177</sup>] pS(174-182), (D) [Phe<sup>179</sup>] pS(174-182), (D) [Tyr<sup>179</sup>] pS(174-182).

[Phe<sup>176</sup>]pS(174-182)

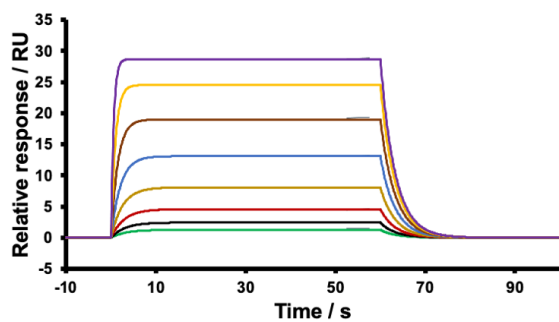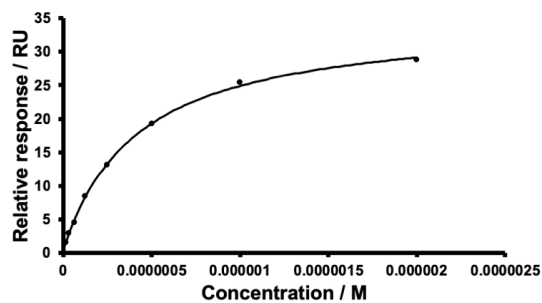

[Tyr<sup>176</sup>]pS(174-182)

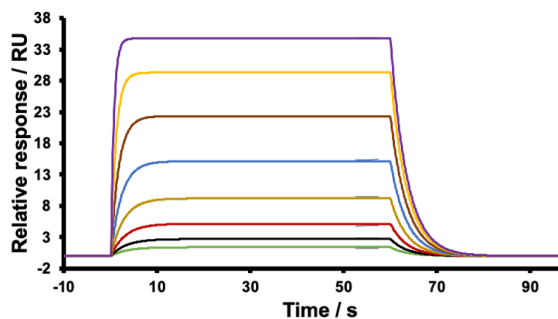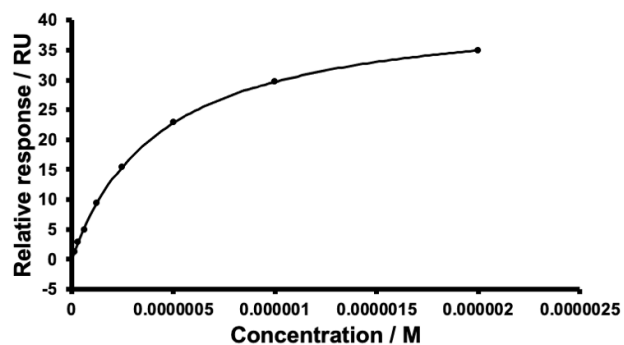

[Lys<sup>177</sup>]pS(174-182)

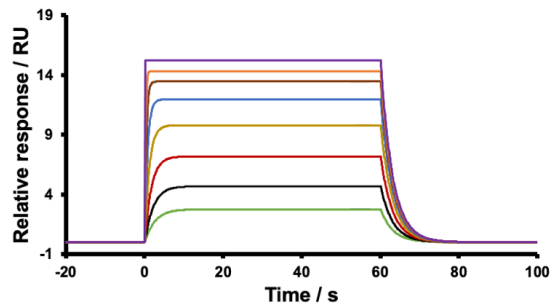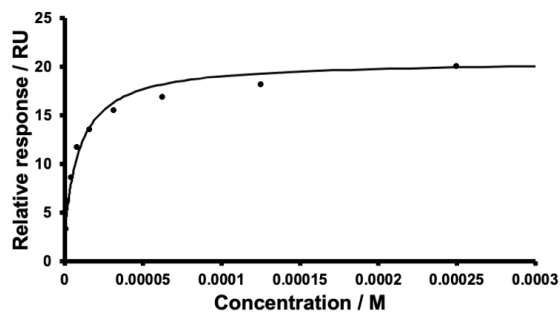

[Phe<sup>179</sup>]pS(174-182)

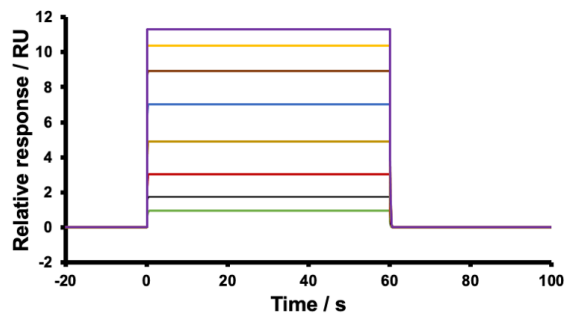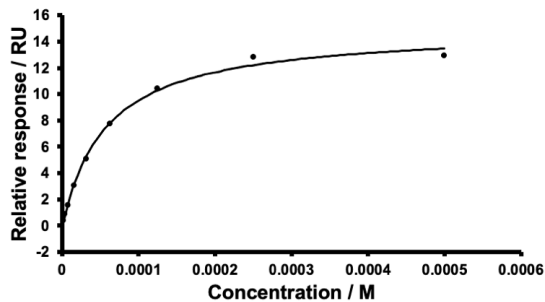



[Tyr<sup>179</sup>]pS(174-182)

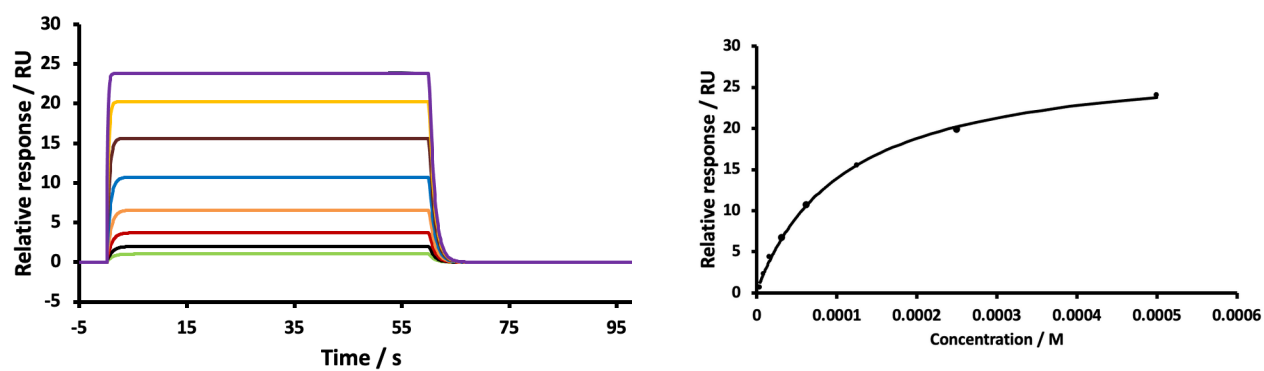

**Figure S5:** Representative results from surface plasmon resonance. 14-3-3 $\epsilon$  was immobilized on NTA sensor chip. Binding of the ligands to 14-3-3 $\epsilon$  was measured at concentration range of 0–100  $\mu$ M. Sensograms (left panel) and their respective binding isotherm (right panel).

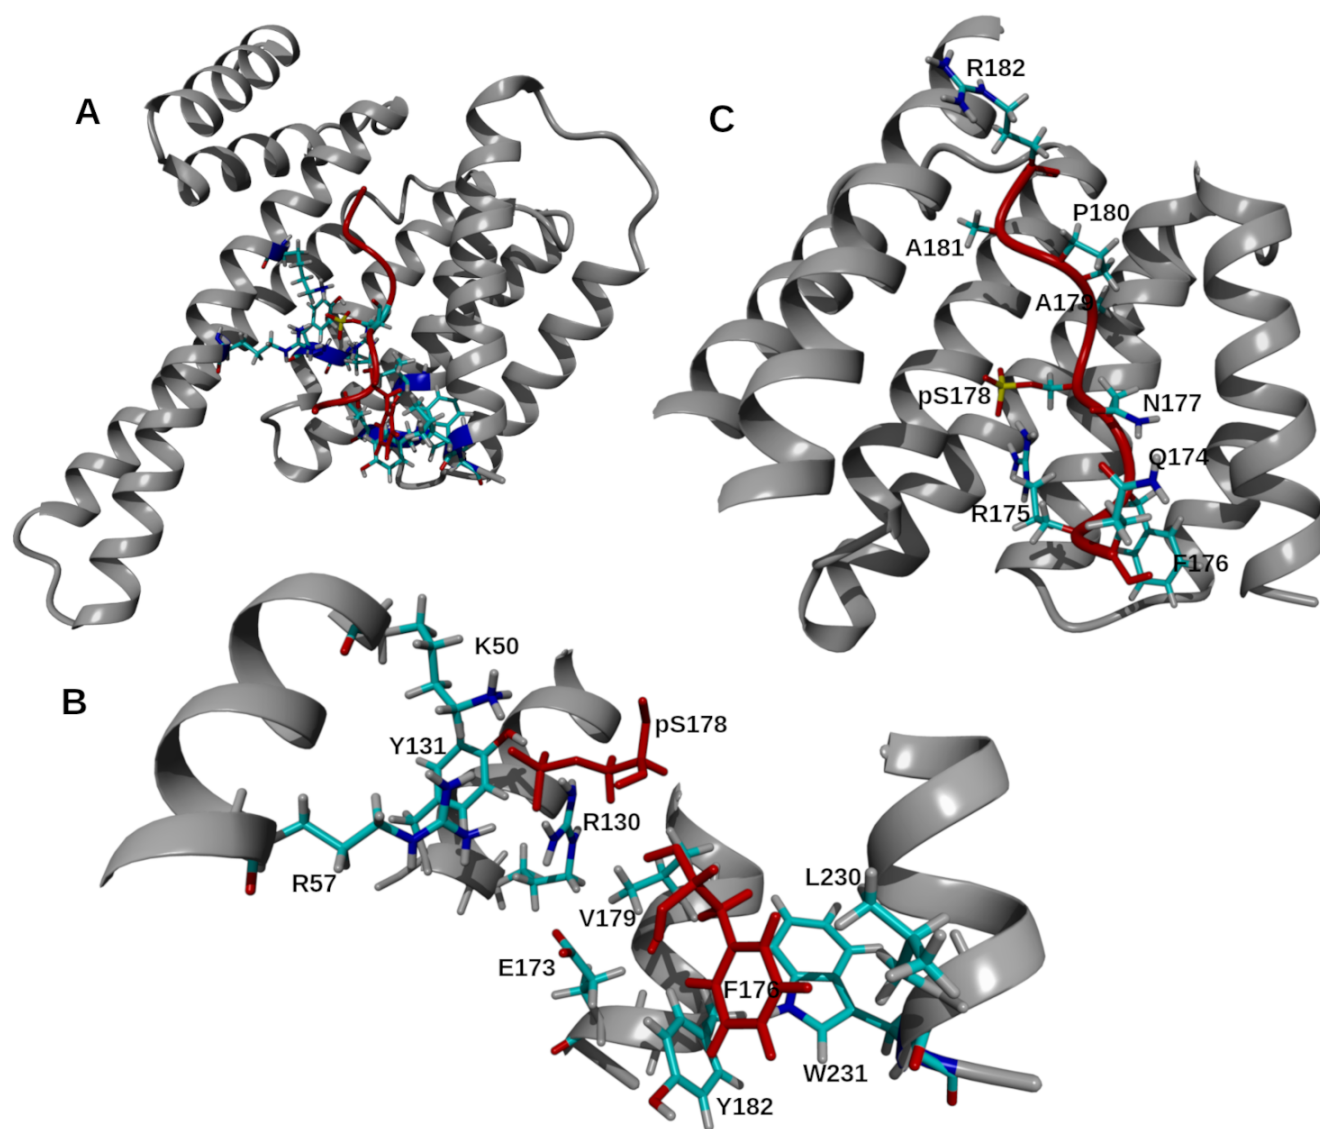

**Figure S6: Interactions between 14-3-3ε protein and [Phe<sup>176</sup>]pS(174-182) peptide**

(A) The structures of 14-3-3ε - [Phe<sup>176</sup>]pS(174-182) peptide complex, the structure of the protein and peptide are shown as gray ribbon and red tube, respectively. Atoms in pSer<sup>178</sup> are represented as H, white; C, cyan; O, red; P, yellow stick. Phe<sup>176</sup> is shown in red sticks. (B) A close-up view of (A) showing residues of 14-3-3ε that interact with pSer<sup>178</sup> and Phe<sup>176</sup> residues of the peptide. H-bonds were identified within 0.25 nm, hydrophobic and  $\pi$ - $\pi$  interactions cutoff was 0.8 nm (C) A display of residues of the peptide in the binding groove of 14-3-3ε. Amino acid residues are labeled in one letter code in B and C.

**Table S1. Interaction energies between the truncated peptides and 14-3-3 $\epsilon$** 

| Peptide     | Interaction energies (kJ/mol) |
|-------------|-------------------------------|
| pS(173-185) | -1464.72 $\pm$ 134.06         |
| pS(173-184) | -1422.65 $\pm$ 137.24         |
| pS(173-183) | -1260.31 $\pm$ 32.18          |
| pS(174-183) | -1251.05 $\pm$ 96.01          |
| pS(174-182) | -1165.30 $\pm$ 128.29         |

**Table S2. Components of  $\Delta G$  of the peptide upon Ala-scan of the indicated residues**

| Residues | Polar  | Non polar | Coulomb | Van der Waals | Polar solvation | Nonpolar solvation | -T $\Delta S$ | $\Delta G$ | $\Delta\Delta G$ |
|----------|--------|-----------|---------|---------------|-----------------|--------------------|---------------|------------|------------------|
| WT       | -618.1 | -213.6    | -2073.0 | -181.6        | 1454.9          | -32.0              | 210.85        | -620.83    | NA               |
| Gln174   | -614.5 | -213.3    | -2066.0 | -181.4        | 1451.5          | -32.0              | 217.66        | -610.24    | 10.59            |
| Arg175   | -544.2 | -196.2    | -1748.1 | -165.1        | 1203.9          | -31.1              | 238.62        | -502.08    | 118.75           |
| Gln176   | -616.3 | -191.7    | -2034.0 | -161.5        | 1417.7          | -30.2              | 207.53        | -600.46    | 20.37            |
| Asn177   | -602.1 | -209.4    | -2042.1 | -177.6        | 1439.9          | -31.8              | 205.93        | -605.56    | 15.27            |
| pSer178  | 429.4  | -249.8    | -1535.6 | -219.0        | 1965.0          | -30.8              | 218.90        | 398.50     | 1018.5           |
| Arg182   | -553.9 | -201.9    | -1073.0 | -173.1        | 519.0           | -28.8              | 161.20        | -594.50    | 26.33            |

Energies are presented in kJ/mol. NA ; not applicable

**Table S3. Ionic interactions between residues of pS(174-182) and 14-3-3 $\epsilon$  during a 500 ns MD simulation**

|                    | <b>Residues of 14-3-3<math>\epsilon</math></b> | <b>Residues of pS(174-182)</b> | <b>Occupancy (%)</b> |
|--------------------|------------------------------------------------|--------------------------------|----------------------|
| <b>Saltbridges</b> | Glu134                                         | Arg175                         | 76.9                 |
|                    | Glu183                                         | Arg175                         | 83.9                 |
|                    | Asp216                                         | Arg182                         | 79.6                 |
|                    | Glu15                                          | Arg182                         | 20.2                 |
|                    | Glu40                                          | Arg182                         | 5.7                  |
|                    | Glu212                                         | Arg182                         | 5.01                 |
|                    | Asp226                                         | Arg175                         | 1.4                  |

**Table S4. Hydrogen bonds between residues of pS(174-182) and 14-3-3 $\epsilon$ , during a 500 ns simulation.**

|                | Donor        | Acceptor     | % occupancy |
|----------------|--------------|--------------|-------------|
| <b>H-bonds</b> | ARG130-Side  | pSER178-Side | 100.00      |
|                | TYR131-Side  | pSER178-Side | 99.18       |
|                | ARG57-Side   | pSER178-Side | 99.95       |
|                | ALA179-Main  | ASN176-Side  | 96.52       |
|                | SLYS50-Side  | pSER178-Side | 95.72       |
|                | SER46-Side   | ALA181-Main  | 70.60       |
|                | ASN227-Side  | ASN177-Main  | 62.97       |
|                | ARG182-Side  | ASN43-Side   | 61.64       |
|                | TRP231-Side  | GLN176-Side  | 55.28       |
|                | ARG182-Side  | ASP216-Side  | 44.84       |
|                | GLN176-Side  | ASN227-Side  | 33.37       |
|                | pSER178-Side | ASN176-Side  | 27.58       |
|                | LEU175-Side  | ASN177-Main  | 19.90       |
|                | ARG175-Side  | ARG61-Side   | 15.28       |
|                | LEU230-Side  | GLN176-Side  | 14.85       |
|                | LEU223-Side  | ASN177-Side  | 13.05       |
|                | ASN177-Side  | ASN227-Side  | 12.66       |
|                | LEU175-Side  | ALA179-Side  | 11.91       |
|                | LEU175-Side  | ALA179-Main  | 11.08       |
|                | GLN176-Side  | GLU183-Side  | 11.03       |
|                | ALA181-Side  | SER46-Main   | 10.97       |
|                | PRO180-Side  | LEU223-Side  | 9.75        |
|                | PHE120-Side  | ARG182-Side  | 9.08        |
|                | GLN176-Side  | TYR182-Side  | 7.91        |
|                | ARG182-Side  | ILE169-Side  | 7.73        |
|                | VAL179-Side  | ASN177-Main  | 6.44        |

Residues of pS(174-182) are highlighted in red, and residues of 14-3-3 $\epsilon$  are in black. Side (side chain); Main, (main chain).

**Table S5. Composition of Secondary Structure of the pS(174-182)**

| Secondary structure             | % of secondary structure |
|---------------------------------|--------------------------|
| Random coil                     | 77                       |
| $\beta$ -bridge + $\beta$ -turn | 5                        |
| $\beta$ -bent                   | 19                       |
| $\beta$ -turn                   | 5                        |

The secondary structure composition was calculated by SDDP method

**Table S6. Free Energy of Binding of the Peptidessecond best**

| Peptides                         | $\Delta G_b$ / kJ mol <sup>-1</sup> |
|----------------------------------|-------------------------------------|
| pS(174-182)                      | -128.62 $\pm$ 8.05                  |
| [Phe <sup>176</sup> ]pS(174-182) | -148.76 $\pm$ 5.86                  |
| [Tyr <sup>176</sup> ]pS(174-182) | -157.23 $\pm$ 6.57                  |
| [Lys <sup>177</sup> ]pS(174-182) | -144.86 $\pm$ 7.04                  |
| [Phe <sup>177</sup> ]pS(174-182) | -132.15 $\pm$ 5.61                  |
| [Trp <sup>177</sup> ]pS(174-182) | -130.39 $\pm$ 5.43                  |
| [Phe <sup>179</sup> ]pS(174-182) | -140.96 $\pm$ 5.89                  |
| [Tyr <sup>179</sup> ]pS(174-182) | -145.79 $\pm$ 5.06                  |

$\Delta G_b$  corresponds to the average and SD of n = 5.  
The data is also presented in figure 4E.

**Table S7. Composition of fraction of secondary structure of pS peptide analogs determined by ECD.**

| Peptide                          | % TFE | Helix | $\beta$ -strand | $\beta$ -turn | unordered | Total |
|----------------------------------|-------|-------|-----------------|---------------|-----------|-------|
| pS                               | 0     | 0.0   | 0.17            | 0.12          | 0.70      | 0.99  |
|                                  | 30    | 0.17  | 0.15            | 0.13          | 0.55      | 1     |
|                                  | 50    | 0.41  | 0.16            | 0.13          | 0.29      | 0.99  |
|                                  | 70    | 0.5   | 0.12            | 0.14          | 0.24      | 1     |
| pS(174-182)                      | 0     | 0.0   | 0.09            | 0.06          | 0.84      | 0.99  |
|                                  | 30    | 0.02  | 0.05            | 0.03          | 0.90      | 1     |
|                                  | 50    | 0.02  | 0.07            | 0.04          | 0.86      | 0.99  |
|                                  | 70    | 0.04  | 0.05            | 0.04          | 0.86      | 0.99  |
| [Phe <sup>176</sup> ]pS(174-182) | 0     | 0.02  | 0.16            | 0.11          | 0.69      | 0.98  |
|                                  | 30    | 0.05  | 0.13            | 0.10          | 0.71      | 0.99  |
|                                  | 50    | 0.05  | 0.18            | 0.10          | 0.66      | 0.99  |
|                                  | 70    | 0.06  | 0.16            | 0.11          | 0.65      | 0.98  |
| [Tyr <sup>176</sup> ]pS(174-182) | 0     | 0.0   | 0.12            | 0.08          | 0.79      | 0.99  |
|                                  | 30    | 0.01  | 0.14            | 0.08          | 0.76      | 0.99  |
|                                  | 50    | 0.02  | 0.13            | 0.08          | 0.76      | 0.99  |
|                                  | 70    | 0.04  | 0.14            | 0.08          | 0.74      | 1     |
| [Phe <sup>179</sup> ]pS(174-182) | 0     | 0.02  | 0.13            | 0.09          | 0.76      | 1     |
|                                  | 30    | 0.02  | 0.17            | 0.10          | 0.69      | 0.98  |
|                                  | 50    | 0.02  | 0.12            | 0.06          | 0.78      | 0.98  |
|                                  | 70    | 0.02  | 0.11            | 0.06          | 0.79      | 0.98  |
| [Tyr <sup>179</sup> ]pS(174-182) | 0     | 0.02  | 0.28            | 0.15          | 0.54      | 0.98  |
|                                  | 30    | 0.02  | 0.25            | 0.15          | 0.55      | 0.97  |
|                                  | 50    | 0.01  | 0.30            | 0.17          | 0.50      | 0.98  |
|                                  | 70    | 0.01  | 0.25            | 0.14          | 0.58      | 0.98  |

Components of secondary structures of peptides were obtained by deconvoluting ECD spectra using the CDSSTR method of DichroWeb web server.
